# Supplementary material for: Polymorphic structures and properties of lead chromium phosphate Pb3Cr2(PO4)4
Source: Royal Society of Chemistry journal article supplement (doi:10.1039/b904277f), 2009-01-01
Supplement: b904277f.pdf [file b904277f.pdf]

## Supporting Information for

# Polymorphic Structures and Properties of Lead Chromium Phosphate $\text{Pb}_3\text{Cr}_2(\text{PO}_4)_4$

Shaoyu Mao,<sup>\*,a</sup> Yanping Mao,<sup>a</sup> Raymond J. Batchelor,<sup>b</sup> Haiyan Guo,<sup>b</sup> Zuo-Guang Ye,<sup>\*,b</sup> Zhaoxiong Xie,<sup>a</sup> and Lansun Zheng<sup>a</sup>

State Key Laboratory for Physical Chemistry of Solid Surfaces, Department of Chemistry, Xiamen University, Xiamen, 361005, China, and Department of Chemistry and 4D LABS, Simon Fraser University, 8888 University Drive, British Columbia, V5A 1S6, Canada

## Contents for Supporting Information:

Table S1. Atomic coordinates and equivalent isotropic displacement parameters for  $\text{Pb}_3\text{Cr}_2(\text{PO}_4)_4$

|                                                       | Atom  | Symmetry | X           | Y          | Z          | $U_{\text{eq}}$ |
|-------------------------------------------------------|-------|----------|-------------|------------|------------|-----------------|
| Monoclinic<br>$\text{Pb}_3\text{Cr}_2(\text{PO}_4)_4$ | Pb(1) | 4e       | 0.29942(10) | 0.20696(9) | 0.52656(9) | 0.0120(4)       |
|                                                       | Pb(2) | 2a       | 0.0000      | 0.5000     | 0.5000     | 0.0090(4)       |
|                                                       | Cr(3) | 4e       | 0.2476(4)   | 0.6307(4)  | 0.2446(4)  | 0.0043(7)       |
|                                                       | P(6)  | 4e       | 0.5745(6)   | 0.0897(6)  | 0.8581(6)  | 0.0053(10)      |
|                                                       | P(7)  | 4e       | -0.0197(6)  | 0.1379(6)  | 0.6554(6)  | 0.0040(10)      |
|                                                       | O(1)  | 4e       | 0.1609(18)  | 0.5918(17) | 0.0125(17) | 0.008(3)        |
|                                                       | O(2)  | 4e       | 0.0937(18)  | 0.7068(15) | 0.7385(17) | 0.006(3)        |

|                                                                 |       |    |             |             |            |            |
|-----------------------------------------------------------------|-------|----|-------------|-------------|------------|------------|
|                                                                 | O(3)  | 4e | 0.5896(19)  | 0.2170(16)  | 0.7557(18) | 0.008(3)   |
|                                                                 | O(11) | 4e | 0.3881(18)  | 0.0442(16)  | 0.7577(17) | 0.007(3)   |
|                                                                 | O(13) | 4e | 0.0840(19)  | 0.4955(17)  | 0.2574(18) | 0.010(3)   |
|                                                                 | O(21) | 4e | 0.3894(19)  | 0.6488(17)  | 0.4789(18) | 0.010(3)   |
|                                                                 | O(22) | 4e | 0.1033(19)  | 0.2462(18)  | 0.6345(17) | 0.009(3)   |
|                                                                 | O(23) | 4e | 0.3135(19)  | 0.4588(18)  | 0.6298(18) | 0.013(3)   |
| Tetragonal                                                      | Pb(1) | 8b | 0.07594(16) | 0.34356(15) | 0.26362(8) | 0.0123(6)  |
| Pb <sub>3</sub> Cr <sub>2</sub> (PO <sub>4</sub> ) <sub>4</sub> | Pb(2) | 4b | 0.13418(16) | 0.13418(16) | 0.0000     | 0.0098(8)  |
|                                                                 | Cr(1) | 8b | 0.5006(6)   | 0.2643(5)   | 0.1213(4)  | 0.0050(12) |
|                                                                 | P(1)  | 8b | 0.2751(10)  | -0.0056(9)  | 0.1714(5)  | 0.0066(17) |
|                                                                 | P(2)  | 8b | -0.0446(10) | 0.2261(9)   | 0.4292(5)  | 0.0047(17) |
|                                                                 | O(3)  | 8b | 0.628(3)    | 0.082(3)    | 0.1186(14) | 0.007(5)   |
|                                                                 | O(4)  | 8b | 0.330(3)    | 0.126(2)    | 0.1179(13) | 0.005(5)   |
|                                                                 | O(5)  | 8b | 0.666(3)    | 0.421(3)    | 0.1277(13) | 0.008(5)   |
|                                                                 | O(6)  | 8b | 0.515(2)    | 0.229(2)    | 0.2382(13) | 0.010(5)   |
|                                                                 | O(7)  | 8b | 0.324(3)    | 0.380(3)    | 0.3152(14) | 0.011(5)   |
|                                                                 | O(8)  | 8b | 0.110(3)    | 0.594(3)    | 0.3126(14) | 0.012(5)   |
|                                                                 | O(9)  | 8b | 0.354(3)    | 0.427(3)    | 0.1286(14) | 0.009(5)   |
|                                                                 | O(10) | 8b | 0.544(3)    | 0.290(3)    | 0.0022(14) | 0.015(5)   |

Table S2. Selected bond distances (Å) and angles (°) in tetragonal and monoclinic Pb<sub>3</sub>Cr<sub>2</sub>(PO<sub>4</sub>)<sub>4</sub>

|                                                                 | Distance   | d (Å)   | Distance   | d (Å)   |
|-----------------------------------------------------------------|------------|---------|------------|---------|
| Tetragonal                                                      | Pb(1)—O(8) | 2.40(3) | Cr(1)—O(6) | 1.96(2) |
| Pb <sub>3</sub> Cr <sub>2</sub> (PO <sub>4</sub> ) <sub>4</sub> | Pb(1)—O(7) | 2.40(2) | Cr(1)—O(4) | 1.96(2) |

|                  |            |                    |           |
|------------------|------------|--------------------|-----------|
| Pb(1)–O(3)       | 2.42(2)    | Cr(1)–O(10)        | 2.02(3)   |
| Pb(1)–O(5)       | 2.46(2)    | Cr(1)–O(9)         | 1.96(2)   |
| Pb(1)–P(2)       | 3.121(8)   | Cr(1)–O(3)         | 1.99(2)   |
| Pb(1)–Pb(2)      | 3.6788(13) | Cr(1)–O(5)         | 2.04(2)   |
| Pb(2)–O(8) ×2    | 2.54(2)    | P(1)–O(10)         | 1.52(3)   |
| Pb(2)–O(7) ×2    | 2.55(2)    | P(1)–O(9)          | 1.54(2)   |
| Pb(2)–O(4) ×2    | 2.62(2)    | P(1)–O(8)          | 1.52(2)   |
| Pb(2)–O(9) ×2    | 2.73(2)    | P(1)–O(4)          | 1.55(2)   |
| Pb(2)–Pb(1) ×2   | 3.6788(13) | P(2)–O(7)          | 1.51(2)   |
|                  |            | P(2)–O(3)          | 1.56(2)   |
|                  |            | P(2)–O(5)          | 1.49(2)   |
|                  |            | P(2)–O(6)          | 1.51(2)   |
| O(8)–Pb(1)–O(7)  | 68.8(8)    | O(8)–Pb(2)–O(8)    | 115.0(11) |
| O(8)–Pb(1)–O(3)  | 72.8(8)    | O(8)–Pb(2)–O(7) ×2 | 179.0(7)  |
| O(8)–Pb(1)–O(5)  | 110.0(8)   | O(8)–Pb(2)–O(7) ×2 | 64.4(8)   |
| O(7)–Pb(1)–O(3)  | 103.9(8)   | O(8)–Pb(2)–O(4) ×2 | 79.5(7)   |
| O(7)–Pb(1)–O(5)  | 78.8(8)    | O(8)–Pb(2)–O(4) ×2 | 72.3(7)   |
| O(3)–Pb(1)–O(5)  | 57.1(7)    | O(8)–Pb(2)–O(9) ×2 | 99.5(7)   |
| O(8)–Pb(1)–P(2)  | 93.5(6)    | O(8)–Pb(2)–O(9) ×2 | 108.6(7)  |
| O(7)–Pb(1)–P(2)  | 93.1(6)    | O(7)–Pb(2)–O(7) ×2 | 116.2(11) |
| O(3)–Pb(1)–P(2)  | 29.3(5)    | O(7)–Pb(2)–O(4) ×2 | 101.1(7)  |
| O(5)–Pb(1)–P(2)  | 28.0(6)    | O(7)–Pb(2)–O(4) ×2 | 106.7(7)  |
| O(8)–Pb(1)–Pb(2) | 43.4(6)    | O(7)–Pb(2)–O(9) ×2 | 79.9(7)   |
| O(7)–Pb(1)–Pb(2) | 43.5(6)    | O(7)–Pb(2)–O(9) ×2 | 72.4(7)   |
| O(3)–Pb(1)–Pb(2) | 112.8(6)   | O(4)–Pb(2)–O(4)    | 126.1(10) |

---

|                  |            |                     |           |
|------------------|------------|---------------------|-----------|
| O(5)–Pb(1)–Pb(2) | 119.7(5)   | O(4)–Pb(2)–O(9) ×2  | 178.9(7)  |
| P(2)–Pb(1)–Pb(2) | 122.34(16) | O(4)–Pb(2)–O(9) ×2  | 53.8(7)   |
| O(6)–Cr(1)–O(9)  | 95.7(10)   | O(8)–Pb(2)–Pb(1) ×2 | 40.4(6)   |
| O(6)–Cr(1)–O(3)  | 81.7(10)   | O(8)–Pb(2)–Pb(1) ×2 | 139.7(6)  |
| O(6)–Cr(1)–O(5)  | 90.7(9)    | O(7)–Pb(2)–Pb(1) ×2 | 139.5(6)  |
| O(6)–Cr(1)–O(4)  | 88.7(9)    | O(7)–Pb(2)–Pb(1) ×2 | 40.4(6)   |
| O(6)–Cr(1)–O(10) | 165.1(10)  | O(4)–Pb(2)–Pb(1) ×2 | 116.5(5)  |
| O(9)–Cr(1)–O(4)  | 86.9(10)   | O(4)–Pb(2)–Pb(1) ×2 | 63.6(5)   |
| O(9)–Cr(1)–O(3)  | 172.6(11)  | O(9)–Pb(2)–Pb(1) ×2 | 62.4(5)   |
| O(9)–Cr(1)–O(5)  | 88.5(10)   | O(9)–Pb(2)–Pb(1) ×2 | 117.5(5)  |
| O(9)–Cr(1)–O(10) | 96.0(10)   | Pb(1)–Pb(2)–Pb(1)   | 179.85(9) |
| O(4)–Cr(1)–O(10) | 101.0(10)  |                     |           |
| O(4)–Cr(1)–O(5)  | 175.3(10)  |                     |           |
| O(4)–Cr(1)–O(3)  | 86.0(10)   |                     |           |
| O(3)–Cr(1)–O(5)  | 98.5(11)   |                     |           |
| O(3)–Cr(1)–O(10) | 87.7(10)   |                     |           |
| O(10)–Cr(1)–O(5) | 80.4(10)   |                     |           |
| O(8)–P(1)–O(9)   | 115.5(14)  | O(7)–P(2)–O(6)      | 112.3(14) |
| O(8)–P(1)–O(4)   | 108.6(14)  | O(7)–P(2)–O(3)      | 112.8(14) |
| O(10)–P(1)–O(8)  | 108.6(14)  | O(6)–P(2)–O(3)      | 108.1(13) |
| O(10)–P(1)–O(4)  | 113.5(13)  | O(5)–P(2)–O(6)      | 110.4(13) |
| O(10)–P(1)–O(9)  | 107.4(13)  | O(5)–P(2)–O(3)      | 99.7(13)  |
| O(9)–P(1)–O(4)   | 103.3(12)  | O(5)–P(2)–O(7)      | 112.6(14) |
| P(1)–O(4)–Cr(1)  | 134.9(14)  | P(2)–O(5)–Cr(1)     | 142.9(15) |
| P(1)–O(9)–Cr(1)  | 139.4(15)  | P(2)–O(3)–Cr(1)     | 131.7(14) |

---

|                                                                               |                   |                      |                   |           |
|-------------------------------------------------------------------------------|-------------------|----------------------|-------------------|-----------|
|                                                                               | P(1)—O(10)—Cr(1)  | 139.2(16)            | P(2)—O(6)—Cr(1)   | 145.4(15) |
| Monoclinic<br>Pb <sub>3</sub> Cr <sub>2</sub> (PO <sub>4</sub> ) <sub>4</sub> | Pb(1)—O(22)       | 2.401(15)            | Cr(3)—O(13)       | 1.943(16) |
|                                                                               | Pb(1)—O(23)       | 2.433(16)            | Cr(3)—O(21)       | 1.964(15) |
|                                                                               | Pb(1)—O(11)       | 2.409(14)            | Cr(3)—O(2)        | 1.986(15) |
|                                                                               | Pb(1)—O(3)        | 2.505(15)            | Cr(3)—O(1)        | 1.959(15) |
|                                                                               | Pb(2)—O(23) ×2    | 2.529(16)            | Cr(3)—O(11)       | 1.978(15) |
|                                                                               | Pb(2)—O(13) ×2    | 2.667(15)            | Cr(3)—O(3)        | 1.996(15) |
|                                                                               | Pb(2)—O(22) ×2    | 2.559(16)            |                   |           |
|                                                                               | Pb(2)—O(2) ×2     | 2.710(14)            |                   |           |
|                                                                               | P(7)—O(2)         | 1.539(15)            | P(6)—O(21)        | 1.490(15) |
|                                                                               | P(7)—O(13)        | 1.547(16)            | P(6)—O(3)         | 1.527(15) |
|                                                                               | P(7)—O(22)        | 1.542(16)            | P(6)—O(23)        | 1.513(17) |
|                                                                               | P(7)—O(1)         | 1.552(15)            | P(6)—O(11)        | 1.553(15) |
|                                                                               | O(22)—Pb(1)—O(11) | 74.3(5)              | O(11)—Pb(1)—O(23) | 106.0(5)  |
|                                                                               | O(22)—Pb(1)—O(23) | 67.6(5)              | O(11)—Pb(1)—O(3)  | 57.9(5)   |
|                                                                               | O(22)—Pb(1)—O(3)  | 108.3(5)             | O(23)—Pb(1)—O(3)  | 77.5(5)   |
|                                                                               | O(22)—Pb(1)—P(6)  | 92.3(4)              | O(22)—Pb(1)—Pb(2) | 43.8(4)   |
|                                                                               | O(11)—Pb(1)—P(6)  | 29.1(4)              | O(11)—Pb(1)—Pb(2) | 115.5(3)  |
|                                                                               | O(23)—Pb(1)—P(6)  | 92.8(4)              | O(23)—Pb(1)—Pb(2) | 43.2(4)   |
|                                                                               | O(3)—Pb(1)—P(6)   | 28.9(3)              | O(3)—Pb(1)—Pb(2)  | 118.4(3)  |
| P(6)—Pb(1)—Pb(2)                                                              | 122.22(10)        |                      |                   |           |
| O(23)—Pb(2)—O(22) ×2                                                          | 63.8(5)           | O(23)—Pb(2)—Pb(1) ×2 | 41.2(4)           |           |
| O(23)—Pb(2)—O(22) ×2                                                          | 116.2(5)          | O(23)—Pb(2)—Pb(1) ×2 | 138.8(4)          |           |
| O(23)—Pb(2)—O(13) ×2                                                          | 74.1(5)           | O(22)—Pb(2)—Pb(1) ×2 | 40.5(3)           |           |
| O(23)—Pb(2)—O(13) ×2                                                          | 105.9(5)          | O(22)—Pb(2)—Pb(1) ×2 | 139.5(3)          |           |

|                      |          |                      |            |
|----------------------|----------|----------------------|------------|
| O(22)–Pb(2)–O(13) ×2 | 102.6(5) | O(13)–Pb(2)–Pb(1) ×2 | 64.8(3)    |
| O(22)–Pb(2)–O(13) ×2 | 77.4(5)  | O(13)–Pb(2)–Pb(1) ×2 | 115.2(3)   |
| O(23)–Pb(2)–O(2) ×2  | 99.0(5)  | O(2)–Pb(2)–Pb(1) ×2  | 61.0(3)    |
| O(23)–Pb(2)–O(2) ×2  | 81.0(5)  | O(2)–Pb(2)–Pb(1) ×2  | 119.0(3)   |
| O(22)–Pb(2)–O(2) ×2  | 72.5(4)  | O(23)–Pb(2)–O(23)    | 180.000(2) |
| O(22)–Pb(2)–O(2) ×2  | 107.5(4) | O(22)–Pb(2)–O(22)    | 180.000(2) |
| O(13)–Pb(2)–O(2) ×2  | 53.5(4)  | O(13)–Pb(2)–O(13)    | 180.000(1) |
| O(13)–Pb(2)–O(2) ×2  | 126.5(4) | O(2)–Pb(2)–O(2)      | 180.000(1) |
| O(13)–Cr(3)–O(1)     | 91.1(6)  | O(21)–Cr(3)–O(11)    | 85.5(6)    |
| O(13)–Cr(3)–O(21)    | 96.5(6)  | O(21)–Cr(3)–O(2)     | 93.7(6)    |
| O(13)–Cr(3)–O(11)    | 88.6(6)  | O(13)–Cr(3)–O(2)     | 86.0(6)    |
| O(1)–Cr(3)–O(21)     | 164.8(7) | O(13)–Cr(3)–O(3)     | 174.6(6)   |
| O(1)–Cr(3)–O(11)     | 81.5(6)  | O(11)–Cr(3)–O(2)     | 174.4(6)   |
| O(1)–Cr(3)–O(2)      | 99.9(6)  | O(11)–Cr(3)–O(3)     | 95.7(6)    |
| O(1)–Cr(3)–O(3)      | 92.8(6)  | O(2)–Cr(3)–O(3)      | 89.6(6)    |
| O(21)–Cr(3)–O(3)     | 80.6(6)  |                      |            |
| O(21)–P(6)–O(3)      | 108.8(9) | O(3)–P(6)–O(11)      | 101.3(8)   |
| O(21)–P(6)–O(11)     | 112.6(8) | O(23)–P(6)–O(3)      | 112.7(9)   |
| O(21)–P(6)–O(23)     | 111.5(9) | O(23)–P(6)–O(11)     | 109.6(9)   |
| O(2)–P(7)–O(22)      | 111.2(8) | O(22)–P(7)–O(13)     | 107.3(9)   |
| O(2)–P(7)–O(13)      | 103.5(8) | O(22)–P(7)–O(1)      | 110.3(8)   |
| O(2)–P(7)–O(1)       | 110.8(8) | O(13)–P(7)–O(1)      | 113.5(8)   |
| P(7)–O(1)–Cr(3)      | 142.3(9) | P(6)–O(11)–Cr(3)     | 136.5(9)   |
| P(7)–O(2)–Cr(3)      | 140.1(9) | P(6)–O(21)–Cr(3)     | 145.6(10)  |
| P(7)–O(13)–Cr(3)     | 134.9(9) | P(6)–O(3)–Cr(3)      | 141.2(10)  |
